# Supplementary material for: Dietary selenomethionine ameliorates lipopolysaccharide-induced renal inflammatory injury in broilersviaregulating the PI3K/AKT pathway to inhibit necroptosis
Source: Royal Society of Chemistry journal article supplement (doi:10.1039/d1fo00424g), 2021-01-01
Supplement: d1fo00424g1.pdf [file d1fo00424g1.pdf]

**Table S1** Total Variance Explained in LPS group

| Component | Initial Eigenvalues |               |              | Extraction Sums of Squared Loadings |               |              |
|-----------|---------------------|---------------|--------------|-------------------------------------|---------------|--------------|
|           | Total               | % of Variance | accumulate % | total                               | % of Variance | accumulate % |
| 1         | 15.536              | 86.314        | 86.314       | 15.536                              | 86.314        | 86.314       |
| 2         | 2.464               | 13.686        | 100.000      | 2.464                               | 13.686        | 100.000      |
| 3         | 1.967E-15           | 1.093E-14     | 100.000      | 1.967E-15                           | 100.000       | 100.000      |
| 4         | 8.750E-16           | 4.861E-15     | 100.000      |                                     |               |              |
| 5         | 7.164E-16           | 3.980E-15     | 100.000      |                                     |               |              |
| 6         | 5.184E-16           | 2.880E-15     | 100.000      |                                     |               |              |

Extraction Method: Principal Component Analysis (PCA).

**Table S2** Total Variance Explained in 0.5 Se + LPS group

| Component | Initial Eigenvalues |               |              | Extraction Sums of Squared Loadings |               |              |
|-----------|---------------------|---------------|--------------|-------------------------------------|---------------|--------------|
|           | Total               | % of Variance | accumulate % | total                               | % of Variance | accumulate % |
| 1         | 11.986              | 66.587        | 66.587       | 11.986                              | 66.587        | 66.587       |
| 2         | 6.014               | 33.413        | 100.000      | 6.014                               | 33.413        | 100.000      |
| 3         | 2.091E-15           | 1.161E-14     | 100.000      | 2.091E-15                           | 100.000       | 100.000      |
| 4         | 8.807E-16           | 4.893E-15     | 100.000      |                                     |               |              |
| 5         | 4.555E-16           | 2.530E-15     | 100.000      |                                     |               |              |
| 6         | 3.109E-16           | 1.727E-15     | 100.000      |                                     |               |              |

Extraction Method: Principal Component Analysis (PCA).
